# Supplementary material for: Identification of Key Genes Associated with 1,2,6-Tri-O-galloyl-β-D-glucopyranose Accumulation in Camellia sinensis Based on Transcriptome Sequencing
Source: MDPI journal article supplement (doi:10.3390/foods13030495), 2024-02-04
Supplement: s1 [file s1]

**Supplementary Figure S1.** Chromatogram in different leaf positions

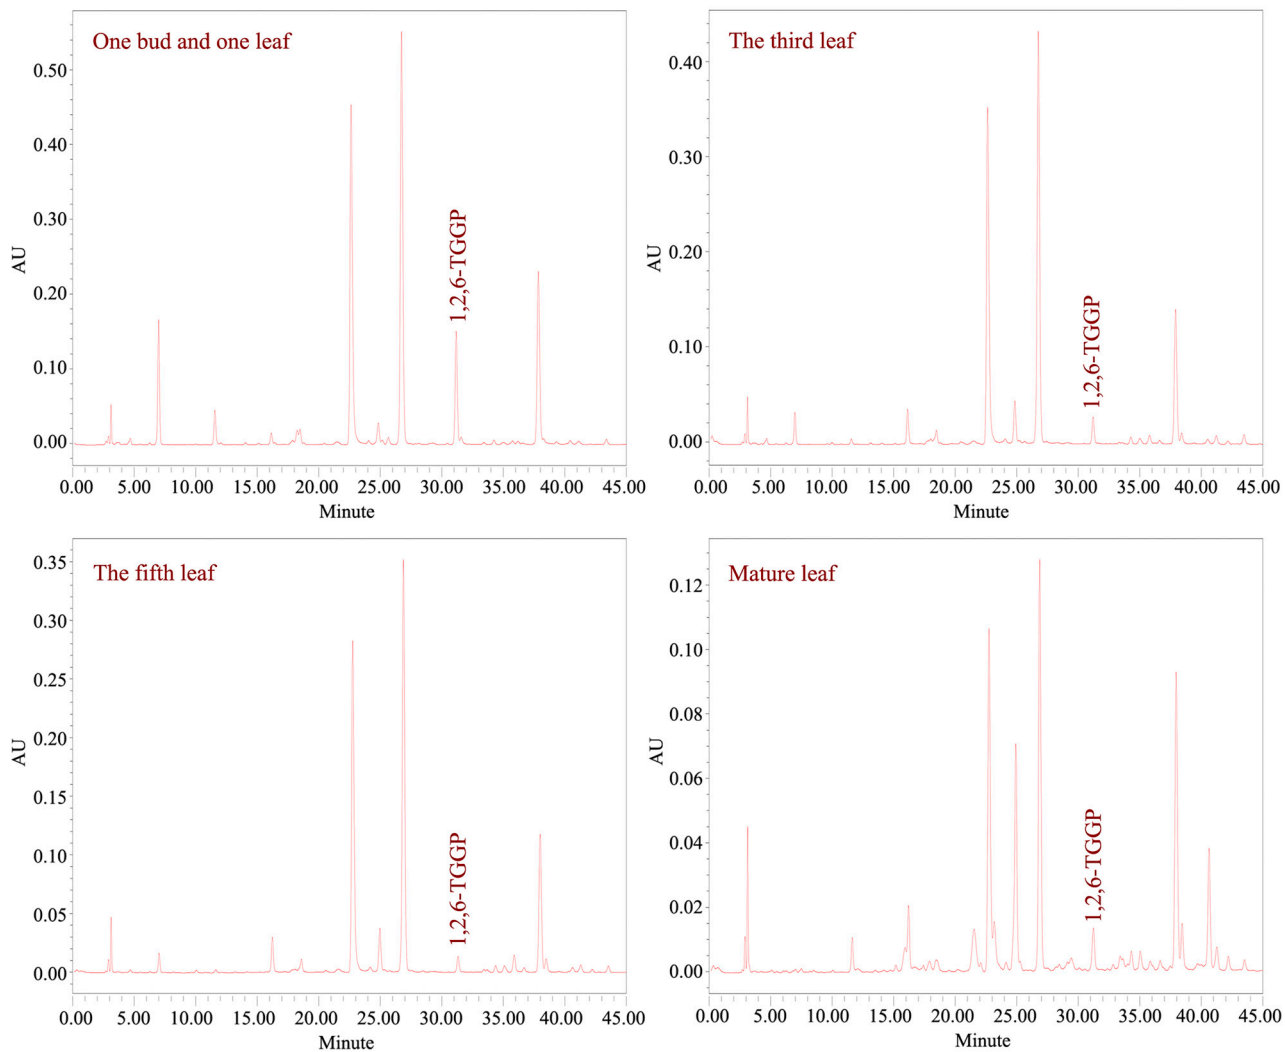

Supplementary Figure S2. Chromatogram in different tea cultivars

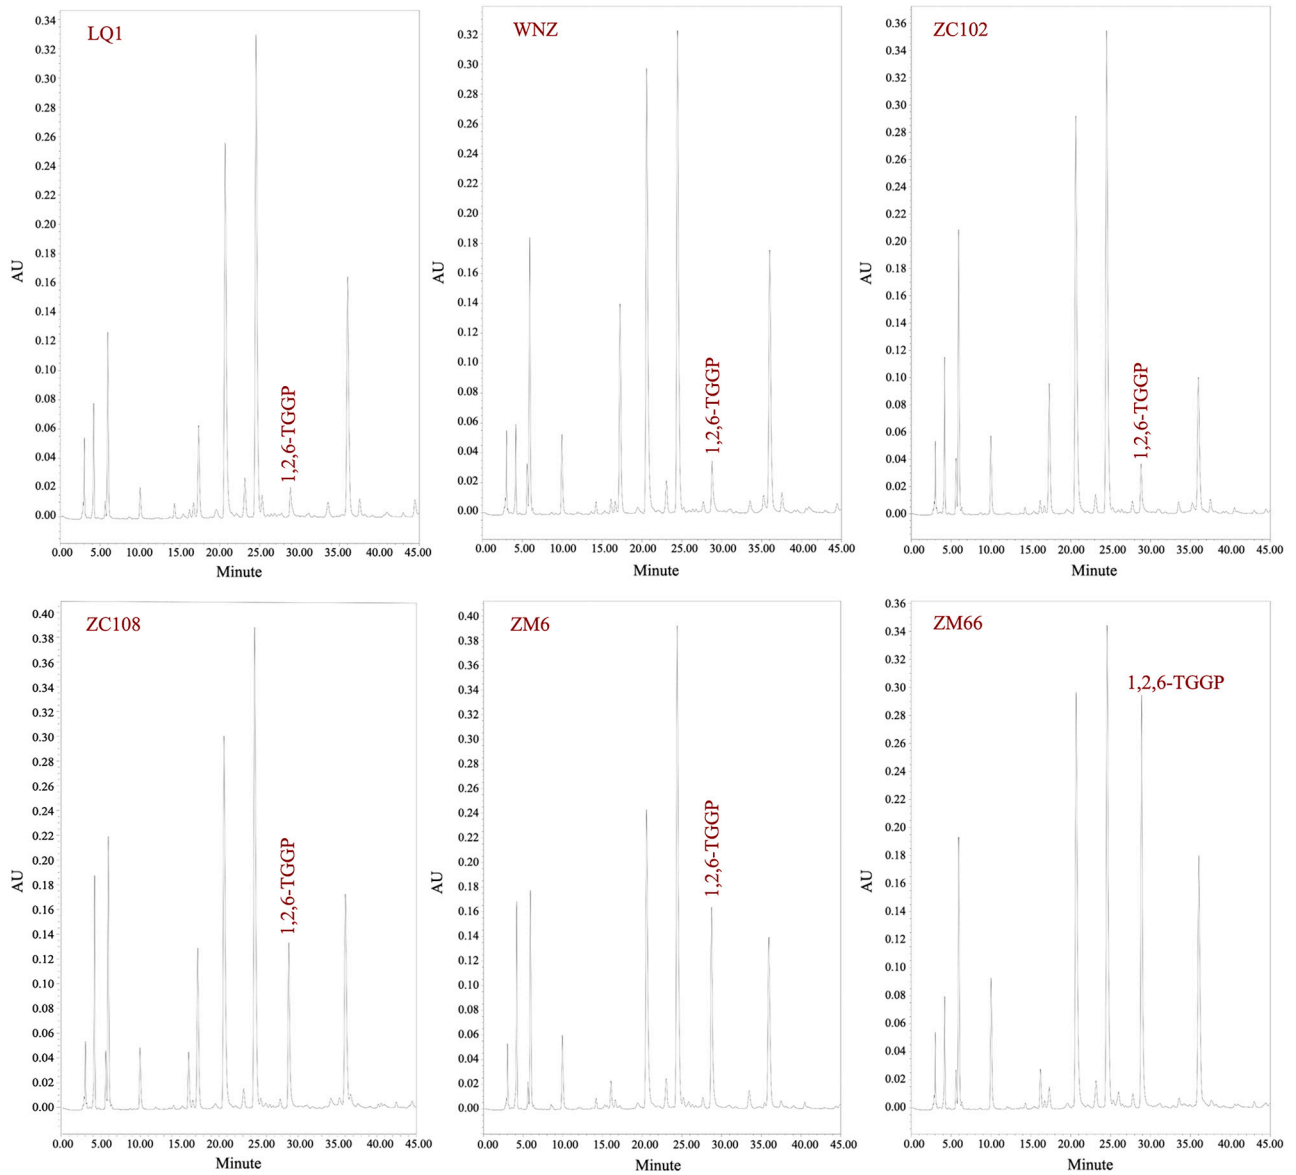

**Supplementary Table S1.** Sample sequencing data evaluation statistics and genome alignment

| Sample  | Raw reads | Clean bases(G) | Error rate (%) | Q20(%) | Q30(%) | GC content (%) | Total mapping (%) | Mapped to exon (%) |
|---------|-----------|----------------|----------------|--------|--------|----------------|-------------------|--------------------|
| ZM66_1  | 44289986  | 6.02           | 0.03           | 96.56  | 90.81  | 43.15          | 84.94             | 73.32              |
| ZM66_2  | 45208290  | 6.19           | 0.03           | 96.83  | 91.35  | 43.55          | 85.95             | 76.12              |
| ZM6_1   | 41461790  | 6.21           | 0.03           | 96.81  | 91.38  | 43.92          | 84.72             | 77.13              |
| ZM6_2   | 45354704  | 6.19           | 0.03           | 96.76  | 91.27  | 43.51          | 84.60             | 75.64              |
| ZC108_1 | 47952532  | 7.19           | 0.03           | 96.76  | 91.20  | 43.77          | 85.53             | 77.08              |
| ZC108_2 | 44362804  | 6.06           | 0.03           | 96.71  | 91.07  | 43.46          | 85.63             | 73.86              |
| ZC102_1 | 44970534  | 6.74           | 0.03           | 96.52  | 90.67  | 43.47          | 83.73             | 73.74              |
| ZC102_2 | 48219098  | 6.69           | 0.03           | 97.02  | 91.80  | 43.8           | 84.93             | 75.86              |
| WNZ_1   | 47292262  | 6.59           | 0.03           | 97.18  | 92.1   | 43.67          | 85.70             | 76.24              |
| WNZ_2   | 44577326  | 6.06           | 0.03           | 96.7   | 91.1   | 43.98          | 85.22             | 77.92              |
| LQ1_1   | 42907800  | 6.04           | 0.03           | 96.81  | 91.29  | 43.96          | 85.40             | 76.68              |
| LQ1_2   | 45254570  | 6.25           | 0.03           | 96.81  | 91.31  | 43.3           | 84.85             | 72.71              |

Q20: The percentage of bases with Phred values greater than 20 in total bases; Q30: The percentage of bases with Phred values greater than 30 in total bases

**Supplementary Table S2.** Genes and primers for qPCR

| Gene ID    | Forward primer (5'-3') | Reverse primer (5'-3') |
|------------|------------------------|------------------------|
| CSS0024764 | GTCCACGGTGTGCCTCTAAT   | CCTTCCCATCTTCTCCTTCC   |
| CSS0047890 | CACGACGTAGCTGCTCTCTG   | AAAACCCATGAAGCCACAAG   |
| CSS0014324 | TCGATAACAAGGGGACAAGC   | AATCACAAACCCAGCGAGTC   |
| CSS0029726 | CGGTGGTTAGTTTTGGCAGT   | GTGATGTTGCAAGGTGGTTG   |
| CSS0032817 | CACAAGGGAGACAAAATGAAG  | ATCCGATGGAGGAGGAGAAAGA |
| CSS0025700 | GGCGAGCATACCCTTTGTAG   | GGTTCGATGCCAACTTCATT   |
| CSS0014307 | TCAGCGCCAAAGGTTATAGG   | CCTGCTCCCTTGACAGTAGC   |
| CSS0016855 | CCAAAAGGCATCGAATGAGT   | TCTGCACATCTGGCCTATTG   |
| novel.5262 | CCGCATCCATCGACTTTTAT   | AGCCCCTCTGGAGAGAAGAC   |
| novel.9843 | CCATGTTCCGGTGTAGGTCT   | TCAACGGTCACATACCCAGA   |
| GAPDH      | TTGGCATCGTTGAGGGTCT    | CAGTGGGAACACGGAAAGC    |
